# Supplementary material for: Highly dispersed encapsulated AuPd nanoparticles on ordered mesoporous carbons for the direct synthesis of H2O2 from molecular oxygen and hydrogen
Source: Royal Society of Chemistry journal article supplement (doi:10.1039/c2cc14667c), 2012-01-01

## **Experimental Section**

AuPd/carbon catalysts were prepared through the incipient wetness method using aqueous solutions of PdCl<sub>2</sub> (Aldrich) and HAuCl<sub>4</sub>•3H<sub>2</sub>O (Aldrich) of acid treated and untreated CMK-3 supports. The theoretical composition was 2.5 wt.% Au and 2.5 wt.% Pd.

Ordered CMK-3 carbon was refluxed in 2 M HNO<sub>3</sub> at room temperature for 0.5 or 2 h in order to create surface oxygen groups in the acid treated CMK-3 sample.

An aqueous solution of HAuCl<sub>4</sub>•3H<sub>2</sub>O [5 ml, 5 g dissolved in water (250 ml)] was mixed with an aqueous solution of PdCl<sub>2</sub> [2.08 ml, 1 g in water (25 ml)] at 80 °C. This solution was added to the carbon (1.9 g). The paste formed was ground and dried at 80 °C overnight and heated in flowing helium at 400 °C for 2 h with a flow of 30 ml/min. The texture and surface chemistry of mesoporous carbon were modified by means of different oxidation treatments in liquid phase to create functional groups. Textural properties of the treated and untreated carbons are reported in Table 1SI. Chemical Catalyst surface areas were determined from the N<sub>2</sub> adsorption isotherms at -196 °C. The data were treated in accordance with the BET method. V<sub>mesopore</sub> and d<sub>pore</sub> were calculated using the BJH method to the desorption branch of the N<sub>2</sub> adsorption isotherm.

Ordered CMK-3 mesoporous carbons were synthesized using SBA-15 silica as template. Mesoporous silica SBA-15 was prepared from a triblock EO20PO70EO20 copolymer (Aldrich) and TEOS (Aldrich) as silica source as described elsewhere [P.F. Fulvio, S. Pikus and M. Jaroniec, J. Colloid Interf. Sci. 287 (2005), p. 717.]. In a typical synthesis of SBA-15, 10 g of triblock copolymer was added to 300 ml of an aqueous solution of 1.7 M hydrochloric acid and stirred at 50 °C for 2 h. Next, 20 g of TEOS was added dropwise and the mixture was stirred at the same temperature for 2 h. The synthesized gels were kept at 108 °C for 24 h under static conditions. The final products were filtered, washed with distilled water and dried firstly at room temperature for 24 h and secondly at 108 °C for 24 h. The synthesized samples were calcined under N<sub>2</sub> atmosphere at 500 °C.

Ordered CMK-3 mesoporous carbons were prepared by incipient wetness impregnation at room temperature of SBA-15 with a mixture of furan resin (Huttenes Albertus) and acetone (mass ratio resin:acetone = 5:1), and nitric acid was used as catalyst. Then, impregnated SBA-15 sample was cured at 108 °C for 1 day and carbonized at 700 °C for 3 h. A silica-carbon composite was obtained. Finally, samples were washed with 3 M NaOH to remove SBA-15 for 24 h and washed with distilled water. After that, carbon support was dried at 108 °C for 24 h.

**Table 1.** Textural properties obtained from N<sub>2</sub> adsorption isotherm data for AuPd catalysts and supports.

| Materials <sup>[a]</sup> | Metal loading         | Order       | Treatment               | S <sub>BET</sub><br>[m <sup>2</sup> g <sup>-1</sup> ] <sup>[b]</sup> | V <sub>mesopore</sub><br>[cm <sup>3</sup> g <sup>-1</sup> ] <sup>[d]</sup> | dpore<br>[nm] <sup>[d]</sup> |
|--------------------------|-----------------------|-------------|-------------------------|----------------------------------------------------------------------|----------------------------------------------------------------------------|------------------------------|
| NORIT                    | -                     | Non ordered | Not treated             | 1300                                                                 | 0.44                                                                       | 4.6                          |
| AP                       | 2.5%wt Au – 2.5%wt Pd | Non ordered | Not treated             | 980                                                                  | 0.53                                                                       | 4.5                          |
| NORIT20                  | -                     | Non ordered | 2 wt.% HNO <sub>3</sub> | 1211                                                                 | 0.46                                                                       | 4.6                          |
| AP20                     | 2.5%wt Au – 2.5%wt Pd | Non ordered | 2 wt.% HNO <sub>3</sub> | 897                                                                  | 0.49                                                                       | 4.6                          |
| O                        | -                     | Ordered     | Not treated             | 1163                                                                 | 0.80                                                                       | 3.3                          |
| APO                      | 2.5%wt Au – 2.5%wt Pd | Ordered     | Not treated             | 822                                                                  | 0.54                                                                       | 3.4                          |
| O20                      | -                     | Ordered     | 2 wt.% HNO <sub>3</sub> | 975                                                                  | 0.70                                                                       | 3.4                          |
| APO20                    | 2.5%wt Au – 2.5%wt Pd | Ordered     | 2 wt.% HNO <sub>3</sub> | 860                                                                  | 0.54                                                                       | 3.4                          |

[a] Catalysts and supports. [b] BET surface area from the N<sub>2</sub> adsorption isotherm. [c] calculated using the BJH method to the desorption branch of the N<sub>2</sub> adsorption isotherm.

**Table 2.** H<sub>2</sub>O<sub>2</sub> production and decomposition over carbon supports and AuPd catalysts.

| Carbon or catalyst and treatment           | Productivity to H <sub>2</sub> O <sub>2</sub><br>[mmol <sub>H2O2</sub> l <sup>-1</sup> ] <sup>[a]</sup> | Decomposition of H <sub>2</sub> O <sub>2</sub><br>[%] <sup>[b]</sup> |
|--------------------------------------------|---------------------------------------------------------------------------------------------------------|----------------------------------------------------------------------|
| NORIT                                      | <0.1                                                                                                    | 0                                                                    |
| NORIT20                                    | <0.1                                                                                                    | 0                                                                    |
| CMK-3 Not treated (O)                      | <0.1                                                                                                    | 0                                                                    |
| CMK-3 2 wt.% HNO <sub>3</sub> (O20)        | <0.1                                                                                                    | 0                                                                    |
| AuPd/NORIT Not treated (AP)                | 11                                                                                                      | 49                                                                   |
| AuPd/NORIT 2 wt.% HNO <sub>3</sub> (AP20)  | 19                                                                                                      | 15                                                                   |
| AuPd/CMK-3 Not treated (APO)               | 15                                                                                                      | 36                                                                   |
| AuPd/CMK-3 2 wt.% HNO <sub>3</sub> (APO20) | 32                                                                                                      | 10                                                                   |

[a] Productivity to H<sub>2</sub>O<sub>2</sub> after 60 min. [b] Decomposition of H<sub>2</sub>O<sub>2</sub> after 60 min

Figure 1SI. Adsorption isotherms and pore size distribution of the different catalysts.

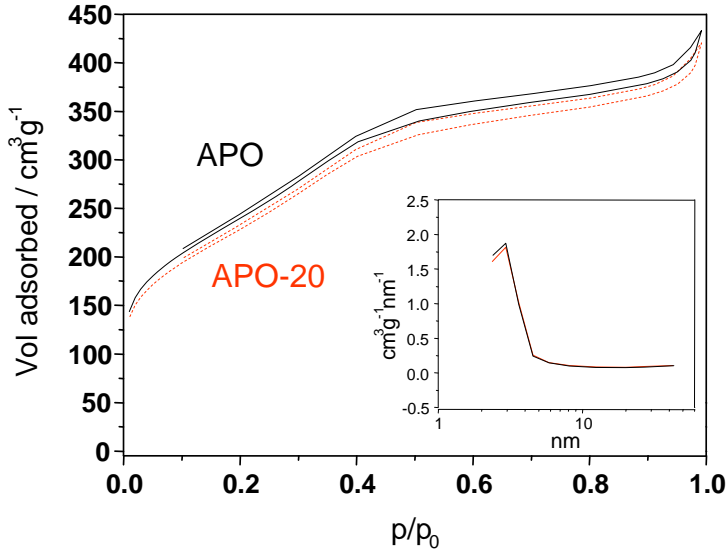

Figure 2SI. Low angle XRD of the different catalysts and supports.

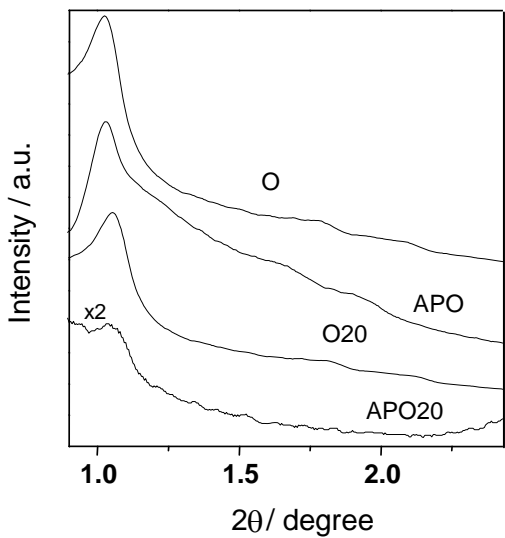

Figure 3SI. XRD pattern of the acid treated Au and AuPd catalysts.

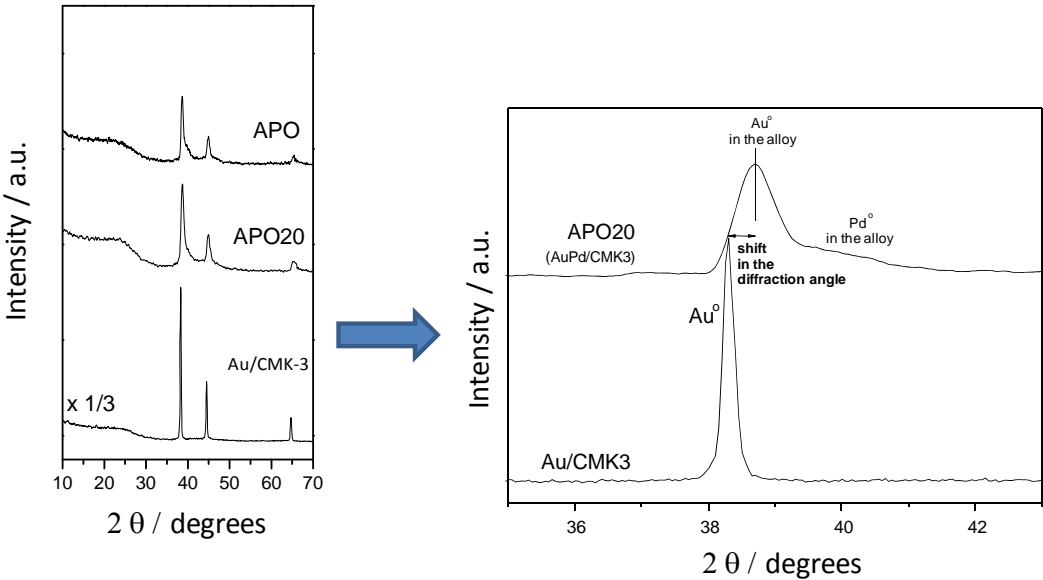

Figure 4SI. CO (a) and CO<sub>2</sub> (b) temperature programmed desorption profiles for the different catalysts and supports.

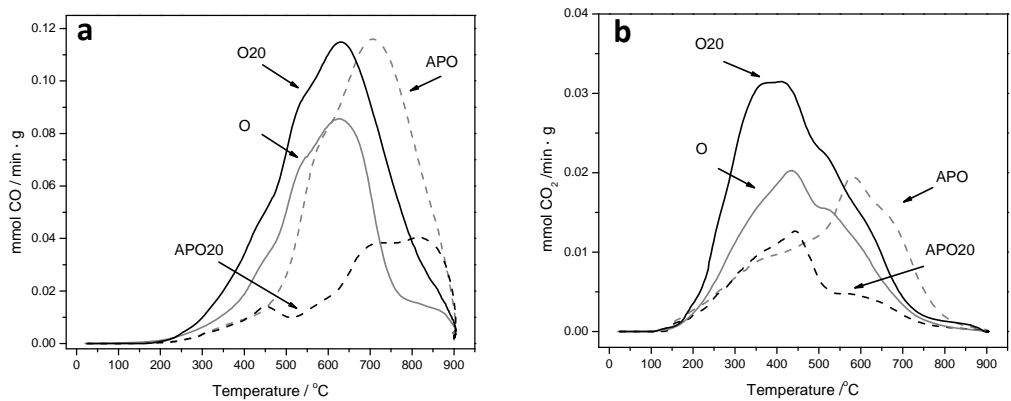

Supplement: c2cc14667c.pdf [file c2cc14667c.pdf]
